# Supplementary material
Source: PubMed Central journal article supplement (PMC2909775)
Supplement: NIHMS212291-supplement-1_si_001.pdf [file NIHMS212291-supplement-1_si_001.pdf]

# Halo, Alkyl, Aryl, and *Bis*(imido) Complexes of Niobium Supported by the $\beta$ -Diketiminato Ligand

*Neil C. Tomson, John Arnold,\* Robert G. Bergman\**

Department of Chemistry, University of California, Berkeley, California 94720

E-mail addresses: [arnold@berkeley.edu](mailto:arnold@berkeley.edu), [rbergman@berkeley.edu](mailto:rbergman@berkeley.edu)

---

## Computational Methods.

DFT calculations were performed with the ORCA program package.<sup>1</sup> The geometry optimization of BDI<sup>+</sup>Nb(NMe)<sub>2</sub> (**11a**) and the single point calculations of the BDI<sup>+</sup> and Nb(NMe)<sub>2</sub><sup>+</sup> were performed at the BP86 level of DFT.<sup>2,3</sup> The all-electron Gaussian basis sets were those developed by the Ahlrichs group.<sup>4,5</sup> Triple- $\zeta$  quality basis sets TZVP with one set of polarization functions on the metal and on the atoms directly coordinated to the metal center were used.<sup>5</sup> For the carbon and hydrogen atoms, slightly smaller polarized split-valence SV(P) basis sets were used, that were of double- $\zeta$  quality in the valence region and contained a polarizing set of d-functions on the non-hydrogen atoms.<sup>4</sup> Auxiliary basis sets used to expand the electron density in the resolution-of-the-identity (RI) approach were chosen to match the orbital basis.<sup>6-8</sup> The SCF calculations were tightly converged ( $1 \times 10^{-7}$  E<sub>h</sub> in energy,  $1 \times 10^{-6}$  E<sub>h</sub> in the density change and  $1 \times 10^{-6}$  in maximum element of the DIIS error vector). The geometry optimization calculation was carried out in redundant internal coordinates without imposing symmetry constraints. The geometry was considered converged after the energy change was less than  $5 \times 10^{-6}$  E<sub>h</sub>, the gradient norm and maximum gradient elements were smaller than  $1 \times 10^{-4}$  E<sub>h</sub> Bohr<sup>-1</sup> and  $3 \times 10^{-4}$  E<sub>h</sub> Bohr<sup>-1</sup>, respectively, and the root-mean square and maximum displacements of all atoms were smaller than  $2 \times 10^{-3}$  Bohr and  $4 \times 10^{-3}$  Bohr, respectively. The coordinates for the BDI<sup>+</sup> and Nb(NMe)<sub>2</sub><sup>+</sup> molecular fragments were taken from the geometry optimized coordinates of **11a**. Canonical orbitals were generated with the program Molekel.<sup>9</sup>

**Complete input file for BDI'Nb(NMe)<sub>2</sub> (11a).**

! RKS BP86 RI SlowConv TightSCF SV(P) SV/J PAL6 OPT UCO NORMALPRINT

```
%basis NewGTO 41 "TZVP" end
      NewGTO 7 "TZVP" end
      NewAuxGTO 41 "TZV/J" end
      NewAuxGTO 7 "TZV/J" end
      end

%scf directresetfreq 20
      diismaxeq 20
      MaxIter 700
      end

%geom MaxIter 300
      end

*xyz 0 1
Nb    0.489005   -0.264693    0.269009
N    -1.103212   -0.087043   -0.618280
C    -2.028618   -0.046992   -1.711255
H    -1.563006   -0.337901   -2.685985
H    -2.459709    0.977568   -1.837957
H    -2.891267   -0.738500   -1.534997
N     1.861421   -0.543682   -0.904993
C     2.383088   -0.708216   -2.231945
H     2.756817   -1.751036   -2.384928
H     1.620631   -0.502337   -3.023811
H     3.246589   -0.019023   -2.405448
N     0.901842    1.365663    1.656322
N     0.428153   -1.789437    1.828281
C     1.467135    2.603796    1.198161
C     2.878317    2.774598    1.237749
C     3.419771    3.979136    0.749356
H     4.514306    4.123689    0.777672
C     2.593687    4.986197    0.224081
H     3.036016    5.921839   -0.157607
C     1.205712    4.794655    0.177943
H     0.554282    5.581092   -0.241006
C     0.615634    3.606268    0.659735
C     3.768386    1.672758    1.762506
H     3.597436    0.729295    1.194289
H     4.841524    1.944579    1.667574
H     3.568072    1.443488    2.833736
C    -0.882006    3.409795    0.617001
H    -1.154900    2.459894    0.099791
H    -1.322791    3.338744    1.638832
```

|   |           |           |          |
|---|-----------|-----------|----------|
| H | -1.379860 | 4.252693  | 0.092499 |
| C | 0.596447  | 2.384222  | 3.888566 |
| H | 0.385644  | 3.345382  | 3.376705 |
| H | 1.619847  | 2.465141  | 4.323242 |
| H | -0.113967 | 2.260574  | 4.732937 |
| C | 0.518785  | 1.198219  | 2.937939 |
| C | 0.102166  | -0.034130 | 3.515814 |
| H | -0.220753 | 0.070941  | 4.562635 |
| C | 0.142198  | -1.390752 | 3.079565 |
| C | -0.097375 | -2.430747 | 4.164554 |
| H | -0.352297 | -3.425104 | 3.746949 |
| H | -0.911879 | -2.103254 | 4.845918 |
| H | 0.819600  | -2.553072 | 4.786695 |
| C | 0.567515  | -3.174775 | 1.474938 |
| C | 1.863448  | -3.756693 | 1.468214 |
| C | 1.991380  | -5.099305 | 1.060777 |
| H | 2.993932  | -5.561267 | 1.051426 |
| C | 0.871932  | -5.847411 | 0.664620 |
| H | 0.992686  | -6.895762 | 0.344575 |
| C | -0.399657 | -5.254842 | 0.671938 |
| H | -1.281664 | -5.838532 | 0.356503 |
| C | -0.579212 | -3.915582 | 1.074965 |
| C | 3.073770  | -2.941287 | 1.858311 |
| H | 3.198847  | -2.074831 | 1.168186 |
| H | 3.997359  | -3.557095 | 1.819783 |
| H | 2.982253  | -2.521915 | 2.885604 |
| C | -1.953032 | -3.285435 | 1.086164 |
| H | -1.965646 | -2.330204 | 0.512039 |
| H | -2.708062 | -3.974387 | 0.651682 |
| H | -2.281530 | -3.030830 | 2.119901 |

\*

**Input files for single point calculations on Nb(NMe)<sub>2</sub><sup>+</sup> and BDI<sup>-</sup>.** Coordinates taken from the geometry optimized coordinates of **11a**.

```
# Nb(NMe)2 cation
! RKS BP86 RI SlowConv TightSCF SV(P) SV/J PAL4 NORMALPRINT
```

```
%basis NewGTO 41 "TZVP" end
      NewGTO 7 "TZVP" end
      NewAuxGTO 41 "TZV/J" end
      NewAuxGTO 7 "TZV/J" end
      end
```

```
%scf directresetfreq 20
      diismaxeq 20
      MaxIter 700
      end
```

```
*xyz 1 1
```

```
.
.
.
*
```

```
# BDI prime anion
! RKS BP86 RI SlowConv TightSCF SV(P) SV/J PAL2 NORMALPRINT
```

```
%scf directresetfreq 20
      diismaxeq 20
      MaxIter 700
      end
```

```
*xyz -1 1
```

```
.
.
.
*
```

**Final Energies.**

(BDI<sup>-</sup>)Nb(NMe)<sub>2</sub>: -4869.641358579 *E<sub>h</sub>*

Nb(NMe)<sub>2</sub><sup>+</sup>: -3945.087586565 *E<sub>h</sub>*

BDI<sup>-</sup>: -924.107113964 *E<sub>h</sub>*

### Coordinates for optimized geometry of 11a.

| Atom | x         | y         | z         |
|------|-----------|-----------|-----------|
| Nb   | 0.787812  | -0.309895 | 0.309422  |
| N    | -0.662966 | -0.141829 | -0.791722 |
| C    | -1.384889 | -0.093469 | -2.028725 |
| H    | -0.745065 | -0.330342 | -2.914598 |
| H    | -1.825432 | 0.920761  | -2.195865 |
| H    | -2.235899 | -0.819692 | -2.025289 |
| N    | 2.310199  | -0.597081 | -0.661931 |
| C    | 3.048534  | -0.767267 | -1.879560 |
| H    | 3.482041  | -1.796012 | -1.943191 |
| H    | 2.421400  | -0.610578 | -2.792116 |
| H    | 3.903602  | -0.048361 | -1.931559 |
| N    | 0.979321  | 1.349002  | 1.718113  |
| N    | 0.495856  | -1.800375 | 1.878506  |
| C    | 1.320277  | 2.644577  | 1.198116  |
| C    | 2.691719  | 3.003813  | 1.077586  |
| C    | 3.005562  | 4.257826  | 0.516275  |
| H    | 4.065986  | 4.547369  | 0.416795  |
| C    | 1.997154  | 5.131560  | 0.081469  |
| H    | 2.263624  | 6.108081  | -0.355601 |
| C    | 0.650319  | 4.756350  | 0.197617  |
| H    | -0.143417 | 5.438544  | -0.151529 |
| C    | 0.284410  | 3.513119  | 0.753014  |
| C    | 3.778803  | 2.051373  | 1.517304  |
| H    | 3.705689  | 1.087241  | 0.962537  |
| H    | 4.785135  | 2.486745  | 1.338756  |
| H    | 3.703244  | 1.798828  | 2.598860  |
| C    | -1.166614 | 3.105913  | 0.860950  |
| H    | -1.346118 | 2.129139  | 0.354279  |
| H    | -1.485814 | 2.970310  | 1.919040  |
| H    | -1.829560 | 3.870497  | 0.403011  |
| C    | 0.844269  | 2.367605  | 3.949811  |
| H    | 0.155637  | 3.176425  | 3.621983  |
| H    | 1.868301  | 2.800911  | 3.923947  |
| H    | 0.602986  | 2.100531  | 4.998359  |
| C    | 0.750841  | 1.159733  | 3.031344  |

|   |           |           |          |
|---|-----------|-----------|----------|
| C | 0.447922  | -0.087378 | 3.647192 |
| H | 0.281278  | -0.006611 | 4.730763 |
| C | 0.354961  | -1.422375 | 3.163059 |
| C | 0.097243  | -2.506135 | 4.197756 |
| H | -0.814442 | -3.091707 | 3.947825 |
| H | -0.024559 | -2.078488 | 5.213034 |
| H | 0.937248  | -3.235985 | 4.222341 |
| C | 0.419596  | -3.182536 | 1.492138 |
| C | 1.615804  | -3.950009 | 1.424637 |
| C | 1.526690  | -5.288103 | 0.991006 |
| H | 2.448506  | -5.891988 | 0.933450 |
| C | 0.294182  | -5.853059 | 0.628625 |
| H | 0.244969  | -6.900163 | 0.287234 |
| C | -0.874082 | -5.078537 | 0.692090 |
| H | -1.842754 | -5.518094 | 0.398808 |
| C | -0.837999 | -3.735772 | 1.120947 |
| C | 2.947858  | -3.332842 | 1.781731 |
| H | 3.161286  | -2.452914 | 1.130493 |
| H | 3.771885  | -4.068815 | 1.664203 |
| H | 2.970318  | -2.960582 | 2.830743 |
| C | -2.096523 | -2.900586 | 1.169781 |
| H | -1.985757 | -1.974134 | 0.559772 |
| H | -2.968565 | -3.474588 | 0.790405 |
| H | -2.336820 | -2.565797 | 2.204029 |

**Geometry optimized structure of 11a.**

*x-axis view*

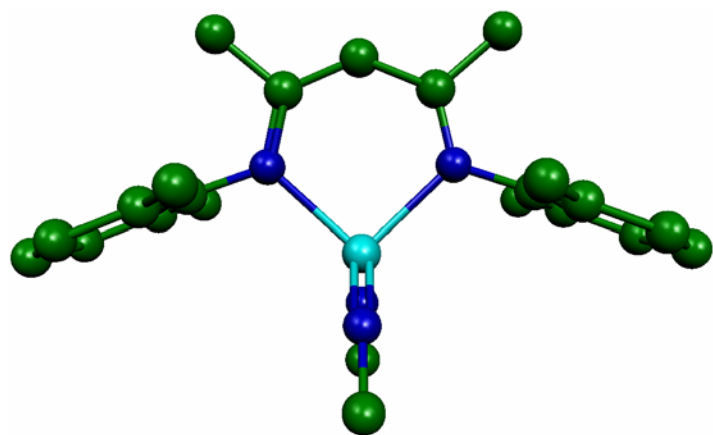

*y-axis view*

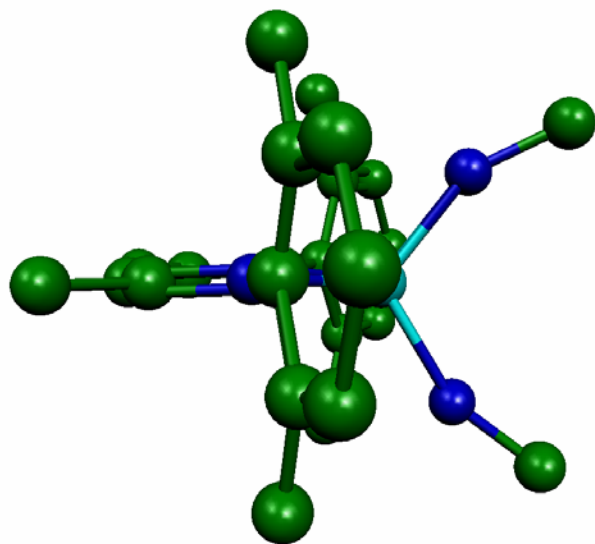

*z-axis view*

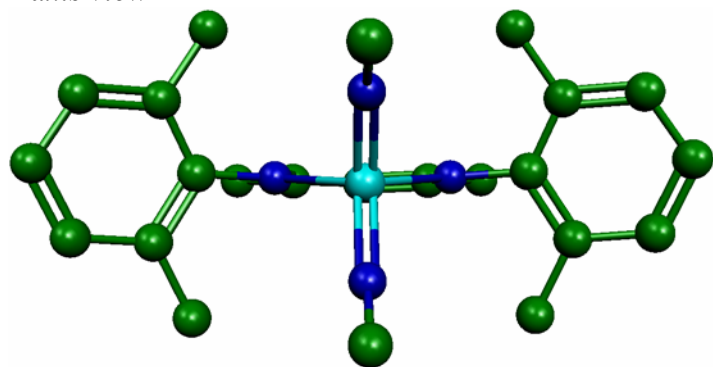



**Relative contributions of various molecular fragments to selected orbitals of 11a.**

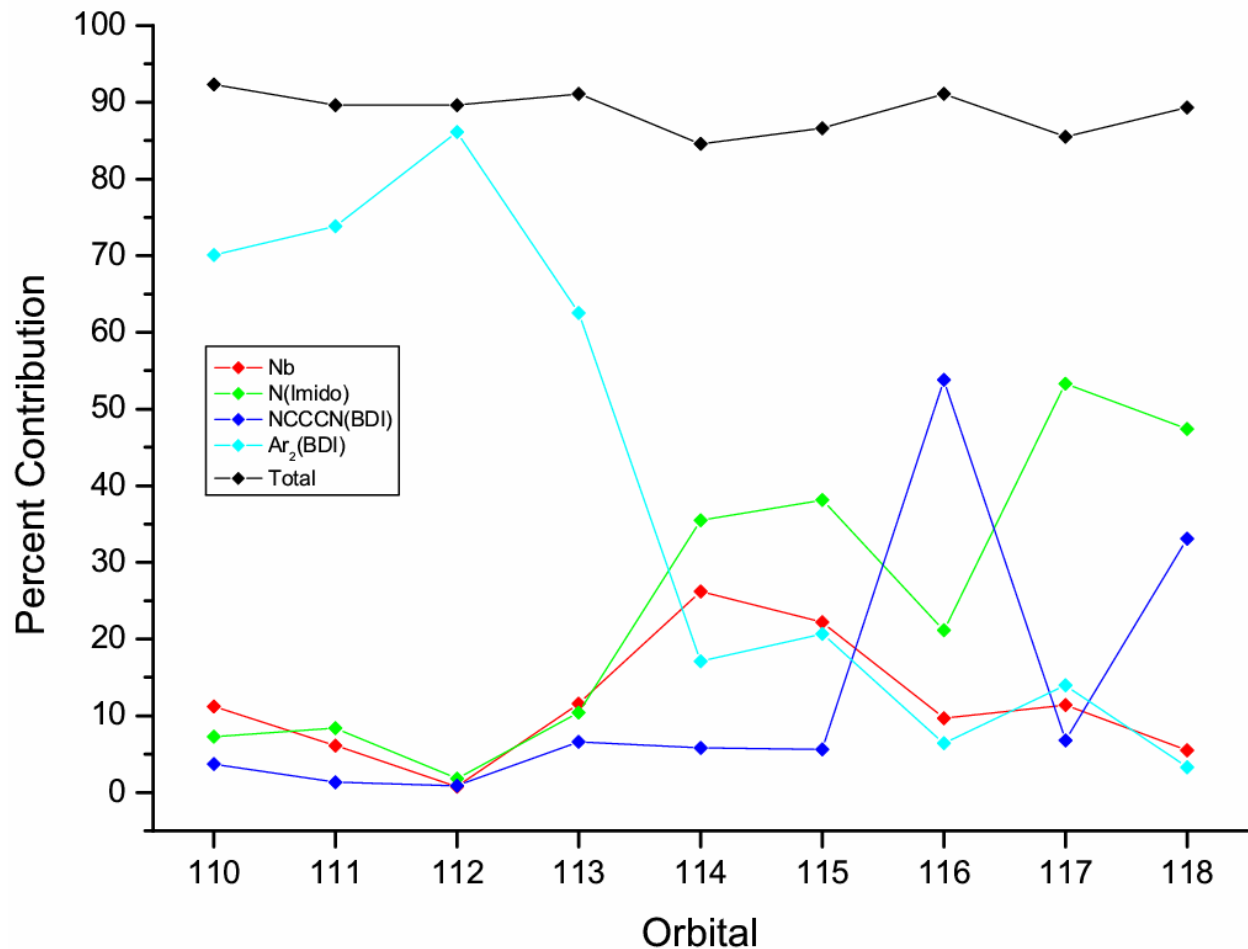

| Orbital | Energy (eV) | Occ. | Nb (%) | N(imido) (%) | NCCCN(BDI) (%) | Ar <sub>2</sub> (BDI) (%) | Total (%) |
|---------|-------------|------|--------|--------------|----------------|---------------------------|-----------|
| 120     | -0.0832     | 0    | 5.4    | 9.6          | 71.9           | 3.3                       | 90.2      |
| 119     | -0.0849     | 0    | 72.5   | 11.8         | 6.6            | 4.8                       | 95.7      |
| 118     | -0.1714     | 2    | 5.5    | 47.4         | 33.1           | 3.3                       | 89.3      |
| 117     | -0.1813     | 2    | 11.4   | 53.3         | 6.8            | 14.0                      | 85.5      |
| 116     | -0.1958     | 2    | 9.7    | 21.2         | 53.8           | 6.4                       | 91.1      |
| 115     | -0.2004     | 2    | 22.2   | 38.1         | 5.6            | 20.7                      | 86.6      |
| 114     | -0.2103     | 2    | 26.2   | 35.5         | 5.8            | 17.1                      | 84.6      |
| 113     | -0.2139     | 2    | 11.6   | 10.4         | 6.6            | 62.5                      | 91.1      |
| 112     | -0.2157     | 2    | 0.8    | 1.8          | 0.9            | 86.1                      | 89.6      |
| 111     | -0.2158     | 2    | 6.1    | 8.4          | 1.3            | 73.8                      | 89.6      |
| 110     | -0.2204     | 2    | 11.2   | 7.3          | 3.7            | 70.1                      | 92.3      |
| 109     | -0.2708     | 2    | 4.9    | 1.0          | 54.2           | 21.9                      | 82.0      |

Molecular orbital scheme for orbitals 109-120 of 11a.

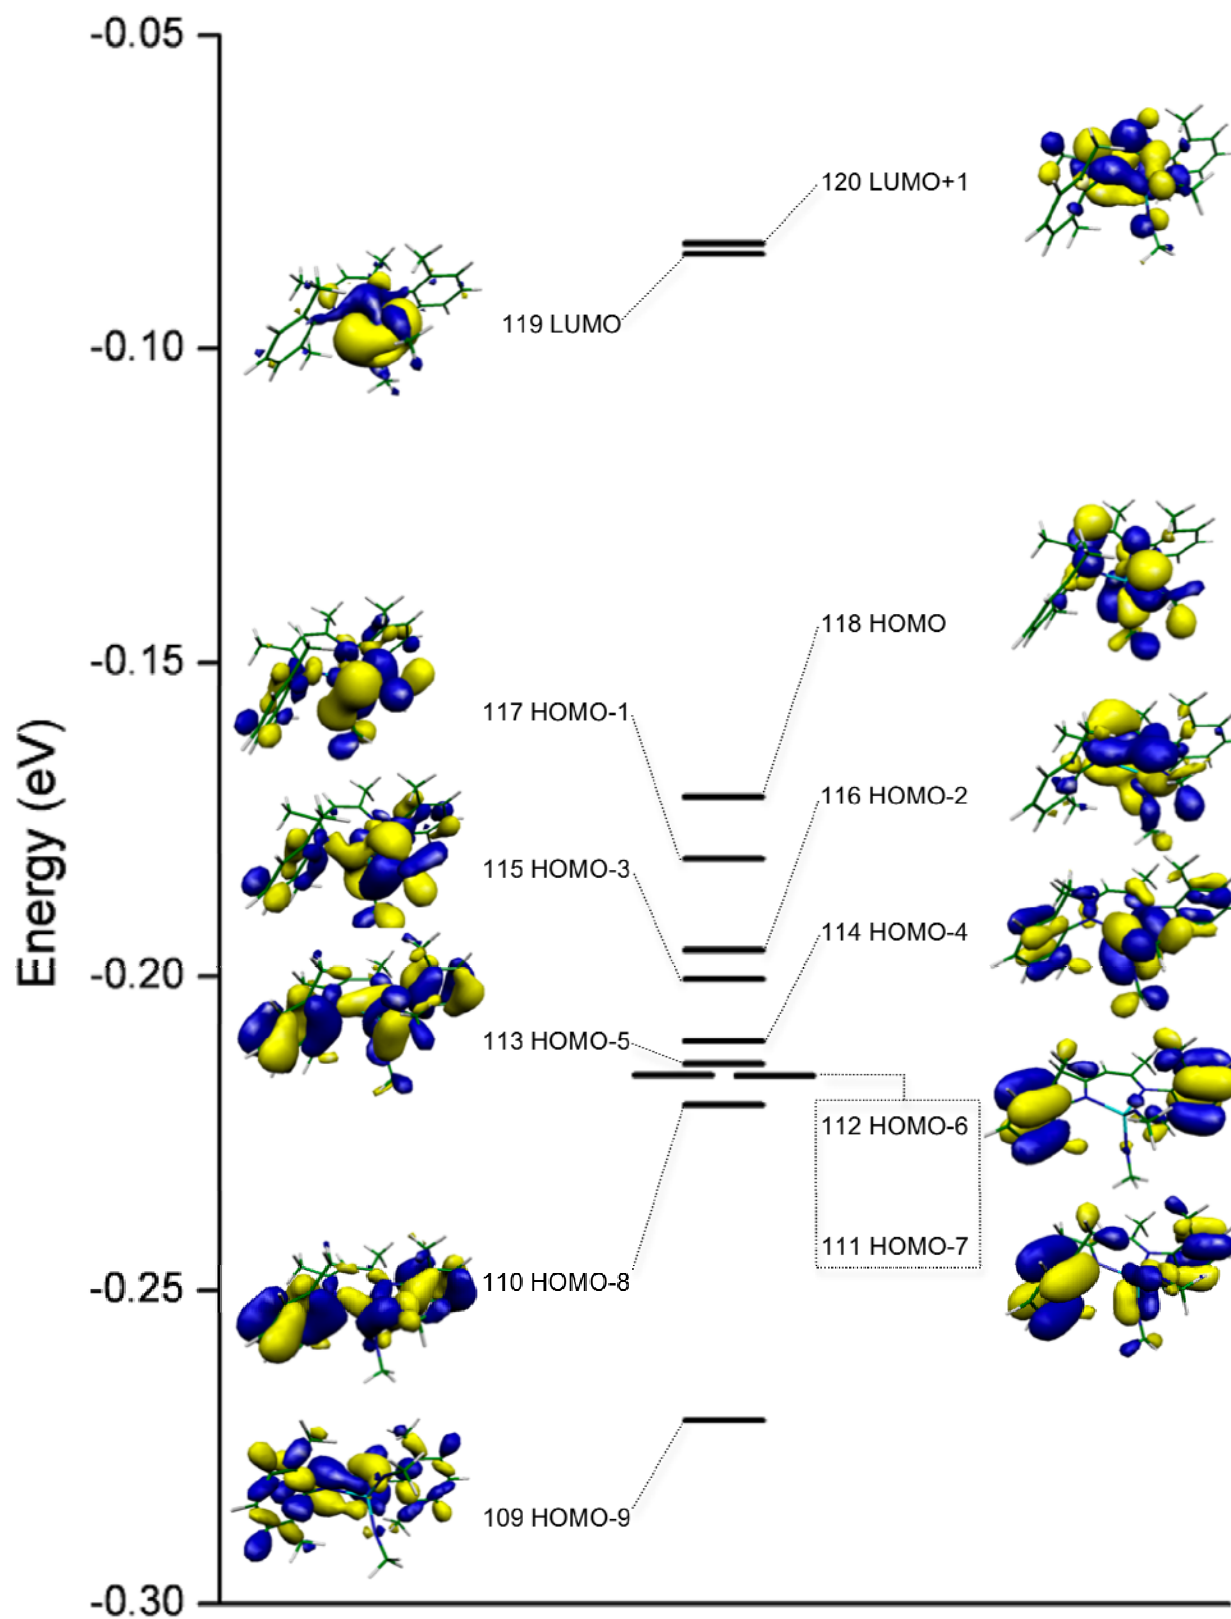

## References for Supporting Information.

- (1) Neese, F. Orca – an ab initio, DFT and Semiempirical Electronic Structure Package, Version 2.7, Revision 0; Institut für Physikalische und Theoretische Chemie, Universität Bonn, Bonn (Germany), August 2009.
- (2) Becke, A. D. *J. Chem. Phys.* **1986**, *84*, 4524.
- (3) Perdew, J. P. *Phys. Rev. B* **1986**, *33*, 8822.
- (4) Schäfer, A.; Horn, H.; Ahlrichs, R. *J. Chem. Phys.* **1992**, *97*, 2571.
- (5) Schäfer, A.; Huber, C.; Ahlrichs, R. *J. Chem. Phys.* **1994**, *100*, 5829.
- (6) Eichkorn, K.; Weigend, F.; Treutler, O.; Ahlrichs, R. *Theor. Chem. Acc.* **1997**, *97*, 119.
- (7) Eichkorn, K.; Treutler, O.; Öhm, H.; Häser, M.; Ahlrichs, R. *Chem. Phys. Lett.* **1995**, *240*, 283.
- (8) Eichkorn, K.; Treutler, O.; Öhm, H.; Häser, M.; Ahlrichs, R. *Chem. Phys. Lett.* **1995**, *242*, 652.
- (9) *Molekel* Advanced Interactive 3D-Graphics for Molecular Sciences, available under <http://www.cscs.ch/molekel/>.
